# Supplementary material for: High surface area carbon aerogels as porous substrates for direct growth of carbon nanotubes
Source: Royal Society of Chemistry journal article supplement (doi:10.1039/c0cc03457f), 2010-01-01
Supplement: c0cc03457f.pdf [file c0cc03457f.pdf]

## Supplementary Material for:

# High Surface Area Carbon Aerogels as Porous Substrates for Direct Growth of Carbon Nanotubes

Marcus A. Worsley, Michael Stadermann, Yinmin M. Wang, Joe H. Satcher, Jr. and Theodore F. Baumann\*

### Experimental Details

*Sample Preparation.* The ACA substrates were prepared through the sol-gel polymerization of resorcinol (R) and formaldehyde (F) using acetic acid as the reaction catalyst, as previously reported.<sup>1</sup> The organic RF aerogels were then carbonized at 1050°C under N<sub>2</sub> and subsequently activated at 950°C using carbon dioxide. An electric cutting tool was used to slice thin slab of the ACA with approximate dimensions of 20 x 5 x 1 mm. For the catalyst loading, these parts were immersed in a 0.1 M acetone solution of NiCl<sub>2</sub>.6H<sub>2</sub>O for ~24 h, then removed from the metal salt solution and dried under a stream of N<sub>2</sub>. The slabs of the Ni-loaded CA were placed in a 2.5-cm long segment of 1-cm diameter quartz tubing and inserted into the middle of a 2.7-cm inner diameter quartz process tube. The tube was flushed with He (60 sccm) for 20 minutes and then placed into a clamshell furnace. The sample was then heated to 400°C under a stream of He (60 sccm) and H<sub>2</sub> (40 sccm) and held at that temperature for 10 min to reduce the impregnated nickel ions to metal nanoparticles. Ethylene (10 sccm) was introduced to the He/H<sub>2</sub> stream and the temperature was held at 400°C for 5 min to facilitate diffusion of ethylene into the sample. Finally, the sample was heated to 800°C at a rate of 40°C/min and held at that temperature for 5 min to allow for CNT growth. The tube was subsequently removed from the furnace and cooled to room temperature under a flow of He (60 sccm).

*Characterization.* The bulk densities of the composites were determined by measuring the dimensions and mass of the monolithic samples. Scanning electron microscopy (SEM) was performed on a JEOL 7401-F. Imaging was done at 5-10keV (20  $\mu$ A) in SEI mode with a working distance of 2-8 mm. Transmission electron microscopy (TEM) was performed on a Phillips CM300FEG operating at 300 keV. Surface areas and pore volumes were determined from Brunauer-Emmett-Teller (BET) and Horvath-Kawazoe (HK) methods using an ASAP 2010 Surface Area Analyzer (Micromeritics).<sup>2</sup> Composite samples were heated to 300°C under vacuum ( $10^{-5}$  Torr) for 24 hours to remove all adsorbed species prior to analysis. Electrical conductivity was measured using the four-probe method similar to previous studies.<sup>3</sup> Metal electrodes were attached to the ends of the CNT-ACA slabs. The amount of current transmitted through the sample during measurement was 100 mA and the voltage drop along the sample was measured over distances of 3 to 6 mm with seven or more measurements taken on each sample.

<sup>1</sup>T. F. Baumann, M. A. Worsley, T. Y. Han, J. H. Satcher, *J. Non-Cryst. Solids* 2008, **354**, 3513.

<sup>2</sup>F. Rouquerol, J. Rouquerol, K. Sing, *Adsorption by Powders & Porous Solids*, Academic Press, London, **1999**.

<sup>3</sup>X. P. Lu, O. Nilsson, J. Fricke, R. W. Pekala, *J. Appl. Phys.* 1993, **73**, 581.
